# Supplementary material
Source: MDPI journal article supplement (https://www.mdpi.com/2071-1050/15/5/4552)
Supplement: s1 [file s1]

**Supplementary Materials:**

**Questionnaire for people who grow a small number of cotton plants and/or spinners and/or weavers.**

What is your name?

Gender: Female, Male, Other

Which state do you live in?\*

Do you own cotton plants or seeds?\*

Yes, plants

Yes, seeds

No

If you have plants or seeds, for what purpose?\*

Medicinal

Manual spinning, and I sell the yarn to someone else to weave

Manual spinning, and the person who is answering the interview also does the weaving

Ornamental

Other:

Do you know the name of the type or species of cotton that you use?

Does the cotton you grow have any of these characteristics?

White fiber

brown fiber

cream fiber

Seeds are clinging together (known as ox-knot)

Seeds are not clinging

Leaves, stems or other parts purplish

Other:

If you plant cotton, where did you get the seeds for planting?

From the same municipality or community

From other municipalities

Other:

Do you sell the cotton products (even if you buy ready-made line)?

Yes, the fiber

Yes, the thread

Yes, fabrics

Yes, carpets

Yes, blankets

Yes, leaves for medicinal use

I do not commercialize, but if I had a place to sell, I would

I have no intention of marketing cotton products

Other:

Which municipality do you live?\*

Part of a traditional community

Indigenous

Quilombola

Riverine

No

What is the year of your birth?\*

How do you sell your products?

At home

Store on street

Store in commercial center (malls, galleries or similar)

Handicraft fair

On the Internet

Other

How much do you earn per month from selling cotton products on average? If you don't know the exact amount, you can make an estimate.

Do you have another source of income besides cotton and its products?\*

Yes, but the main one comes from cotton products

No

Yes, my main activity is not the planting and selling of cotton and cotton products

Do you intend to exchange the handicraft for another source of income?

Yes

No

Would you like support to sell your products?\*

Cooperatives

Internet

Companies

Others

**Table S1.** *Gossypium barbadense* plants georeferencing points, Kalunga communities.

| Quilombola Kalunga | Community    |        | Latitude     | Longitude    |
|--------------------|--------------|--------|--------------|--------------|
| GB GO 22-01        | Ema          | Dia 12 | 13°36'37.3"S | 47°14'58.2"W |
| GB GO 22-02        | Vão de Almas | Dia 12 | 13°30'27.4"S | 47°18'54.8"W |
| GB GO 22-03 A e B  | Vão de Almas | Dia 12 | 13°27'54.0"S | 47°20'11.6"W |
| GB GO 22-04 A e B  | Vão de Almas | Dia 13 | 13°29'06.5"S | 47°20'32.2"W |
| GB GO 22-05        | Vão de Almas | Dia 13 | 13°27'52.2"S | 47°19'35.6"W |
| GB GO 22-06 A e B  | Vão de Almas | Dia 13 | 13°29'06.5"S | 47°19'09.1"W |
| GB GO 22-07        | Vão de Almas | Dia 13 | 13°26'49.9"S | 47°21'34.2"W |
| GB GO 22-08        | Vão de Almas | Dia 13 | 13°26'50.5"S | 47°21'34.4"W |
| GB GO 22-09 A e B  | Vão de Almas | Dia 14 | 13°28'24.5"S | 47°21'06.4"W |
| GB GO 22-10 A e B  | Vão de Almas | Dia 14 | 13°28'32.4"S | 47°20'07.3"W |
| GB GO 22-11        | Vão de Almas | Dia 14 | 13°28'47.6"S | 47°21'23.0"W |
| GB GO 22-12 A e B  | Engenho II   | Dia 15 | 13°35'06.0"S | 47°28'21.4"W |
| GB GO 22-13        | Engenho II   | Dia 15 | 13°34'51.6"S | 47°28'14.5"W |

**Table S2.** *Gossypium barbadense* plants georeferencing points, Santana do Araguaia.

| Santa do Araguaia-PA | Pará                                               | Latitude   | Longitude   | Altitude |
|----------------------|----------------------------------------------------|------------|-------------|----------|
| GB PA 22-01 A e B    | Assentamento PA Cantão                             | 9°8'44" S  | 50°2'53" W  | 182 m    |
| GB PA 22-02          | Assentamento PA Cantão                             | 9°8'27" S  | 50°3'0" W   | 187 m    |
| GB PA 22-03          | Assentamento PA Cantão                             | 9°2'41" S  | 50°4'45" W  | 205 m    |
| GB PA 22-04          | Assentamento PA Cantão                             | 9°2'37" S  | 50°8'14" W  | 191 m    |
| GB PA 22-05          | Assentamento PA Rio Preto Santa Maria da Barreira  | 9°0'20" S  | 50°11'20" W | 180 m    |
| GB PA 22-06          | Assentamento PA Rio Preto Santa Maria da Barreira  | 8°57'37" S | 50°15'23" W | 191 m    |
| GB PA 22-07          | Cidade de Barreira                                 | 9°17'43" S | 50°2'55" W  | 122 m    |
| GB PA 22-08          | Cidade de Barreira                                 | 9°17'32" S | 50°3'7" W   | 122 m    |
| GB PA 22-09 A e B    | Cidade Nova Barreira                               | 9°13'42" S | 50°12'42" W | 150 m    |
| GB PA 22-09 A e B    | Cidade Nova Barreira                               | 9°13'43" S | 50°12'42" W | 151 m    |
| GB PA 22-10 A e B    | Assentamento PA Gleba Caju                         | 9°19'13" S | 50°19'34" W | 169.7 m  |
| GB PA 22-11          | Assentamento PA Pau Brasil, PA Raimundo Correia 81 | 9°20'08" S | 50°25'42" W | 171 m    |
| GB PA 22-12          | Assentamento PA Pau Brasil                         | 9°18'34" S | 50°32'52" W | 201.4 m  |
